# Supplementary material for: Formation of Linear Plasmonic Heterotrimers Using Nanoparticle Docking to DNA Origami Cages
Source: PubMed Central journal article supplement — J Phys Chem C Nanomater Interfaces. 2024 Jul 8;128(28):11699–708. doi: 10.1021/acs.jpcc.4c02229 (PMC11264316; doi:10.1021/acs.jpcc.4c02229), 2024-07-08
Supplement: jp4c02229_si_001.pdf [file jp4c02229_si_001.pdf]

**Formation of Linear Plasmonic Heterotrimers Using Nanoparticle Docking to DNA Origami Cage**

*Yehan Zhang,<sup>1</sup> A'Lester C. Allen,<sup>2</sup> Zachary J. Petrek,<sup>1</sup> Huan H. Cao,<sup>1</sup> Devanshu Kumar,<sup>1</sup> Melissa C. Goodlad,<sup>1</sup> Vianna G. Martinez,<sup>1</sup> Jasdip Singh,<sup>1</sup> Jin Z. Zhang,<sup>2,\*</sup> and Tao Ye,<sup>1,\*</sup>*

*<sup>1</sup> Department of Chemistry and Biochemistry, University of California, Merced, California, 95343, United States*

*<sup>2</sup> Department of Chemistry and Biochemistry, University of California, Santa Cruz, California 95064, United States*

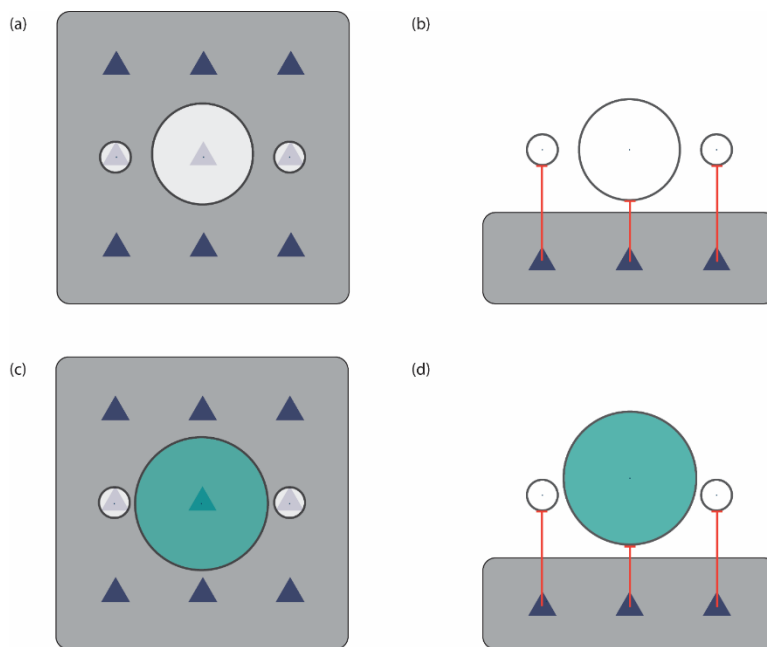

**Figure S1.** Schematic of polydisperse nanoparticles assembled on a DNA origami template. (a) Top view: Three nanoparticles with nominal sizes (white spheres) bound to the template surface (grey square: 2D tiles, blue triangle: binding site). (b) Side view: Three nanoparticles with nominal sizes bound to the template surface (red line: capture strand). The centers of three nanoparticles may be colinear when the capture strands for the smaller nanoparticles can be lengthened. (c) Top view showing that when the central nanoparticle (green sphere) is larger than its nominal size, interparticle gaps become smaller. (d) Side view showing that the bond angle also depends on the nanoparticle sizes. The centers of three nanoparticles are no longer colinear when one or more nanoparticles deviate from their nominal sizes.

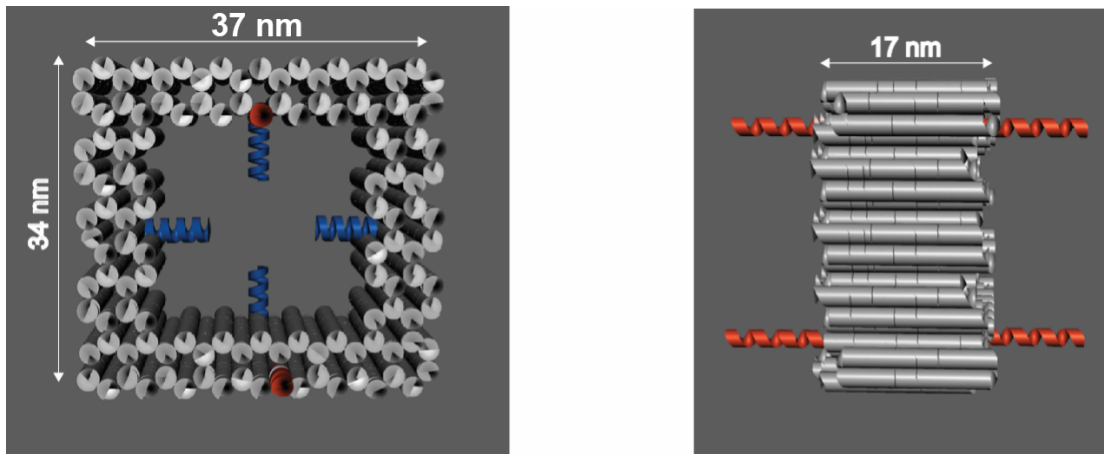

**Figure S2.** Dimensions of 3D hollow origami cage (assuming hydrated 2.2 nm helix width and 3.4 nm of helical turn length). Blue helices are inner capture strands, red helices are outside capture strands.

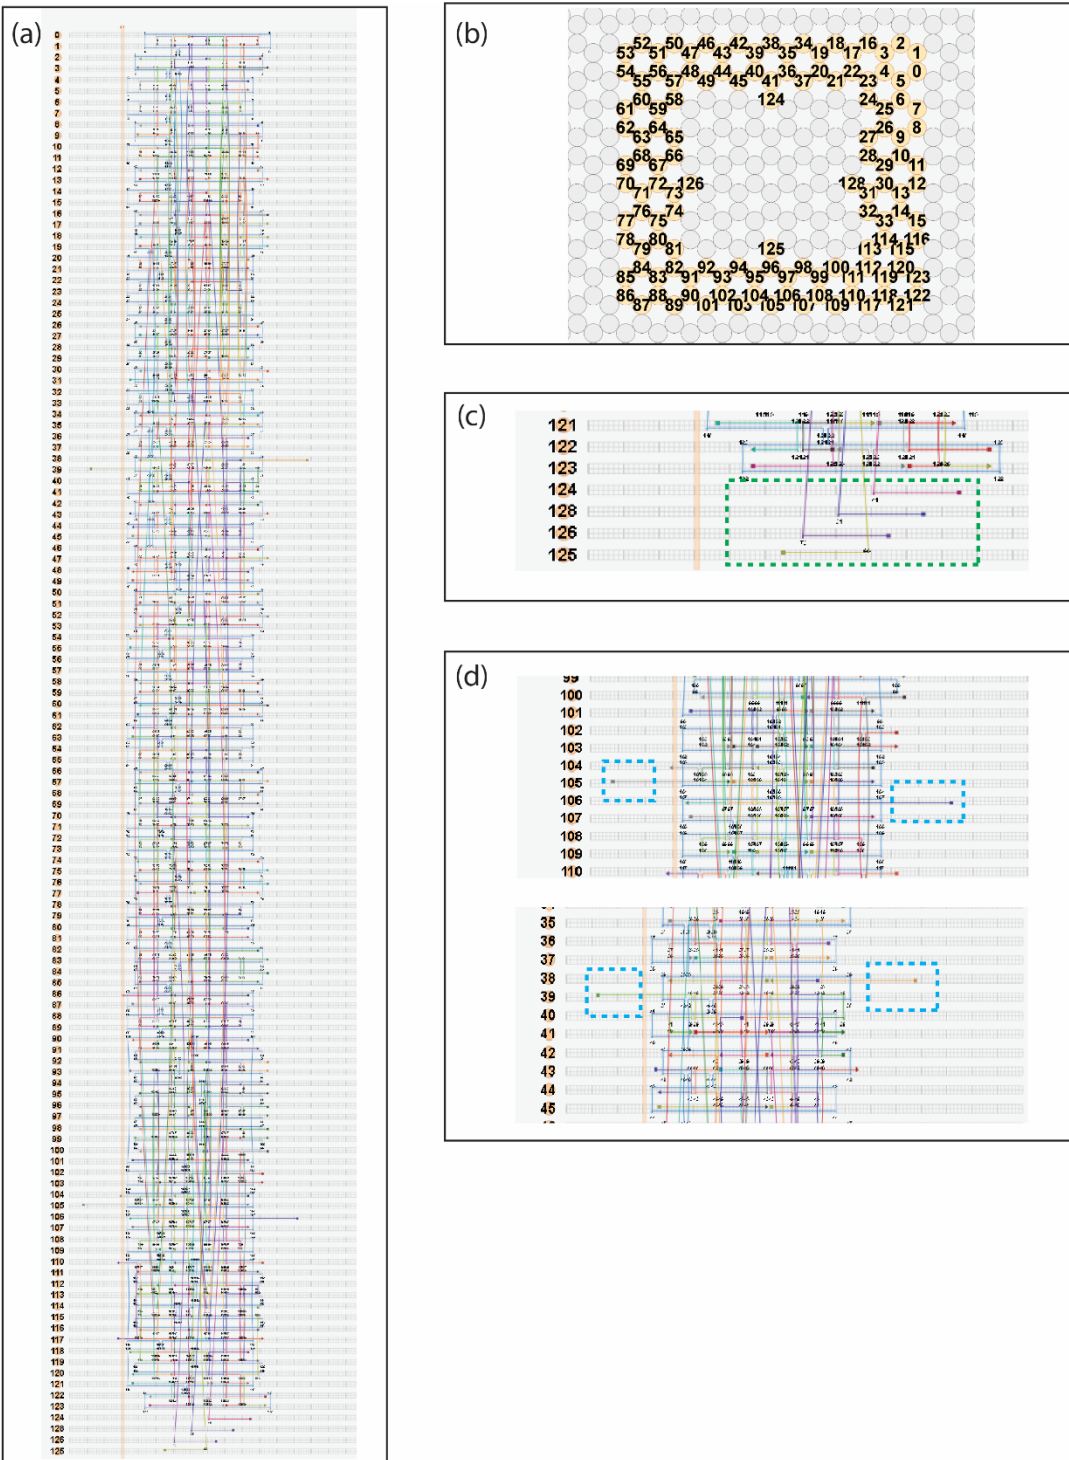

**Figure S3.** Cadnano design of cage. (a) Map of staple strands (triangle end: 3' end, square end: 5' end). (b) Map of honeycomb lattice where helices #123, #124, #125, #128 are added for visualization of inside capture strands located at helices #41, #73, #96, #31 respectively. (c) Inside capture strands (green dashed box). (d) Outside capture strands for 30nm-10nm-30nm and 50nm-10nm-50nm heterotrimers (blue dashed box).

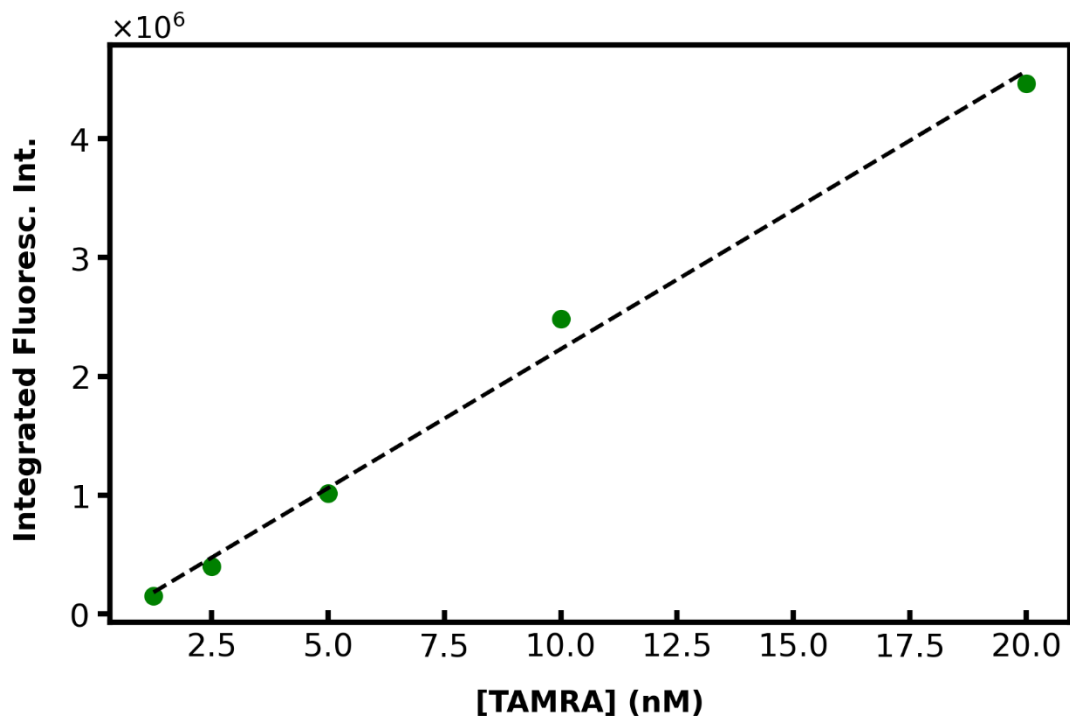

**Figure S4.** Fluorescence calibration curve of TAMRA. Excitation wavelength = 500 nm. Linear regression equation:  $y=233945x+239544$  and  $R^2 = 0.9935$ .

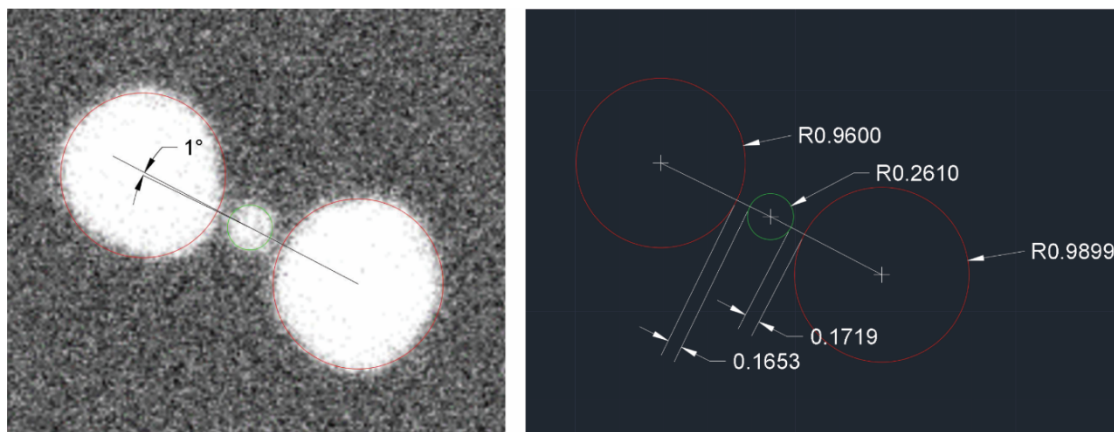

**Figure S5.** Bending angle and gap distance analysis. Masks were placed on SEM image (shown as green and red circles on the left) using AutoCAD 2019. The bending angle was measured using the measuring tool in AutoCAD 2019. The size of AuNPs and gap distances were measured in AutoCAD (right) and converted to actual values using SEM scale bar.

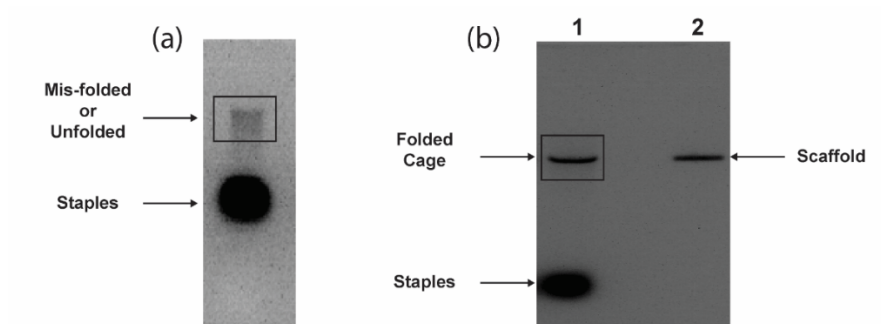

**Figure S6.** Agarose gel results of cage folding. (a) Ramping rate:  $-1.5\text{ }^{\circ}\text{C/hr}$ . (b) Ramping rate:  $-0.2\text{ }^{\circ}\text{C/hr}$ .

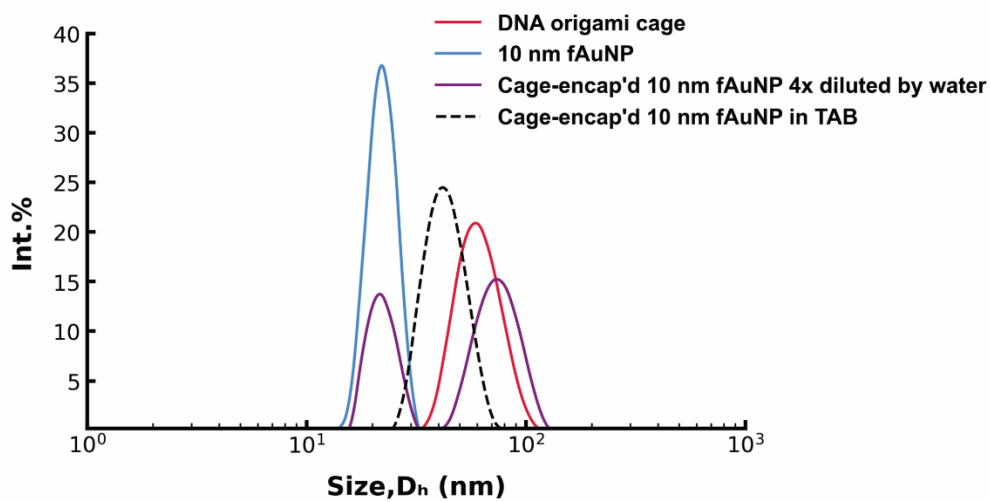

**Figure S7.** DLS analysis of cage-encapsulated 10 nm fAuNP stability in buffers with different ionic strengths. Neat DNA origami cages and neat 10 nm fAuNPs were also annealed.

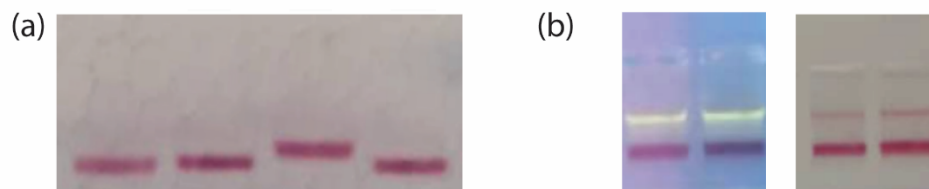

**Figure S8.** Additional agarose gel results of 30 - 10 - 30 nm heterotrimers.(a) Unstained gel result of 30 nm fAuNP mobilities. From left to right: 30 nm fAuNP in water, 30 nm fAuNP mixed with scaffold DNA in TAB, 30 nm fAuNP mixed with all staples in TAB, 30 nm fAuNP in TAB. The only one that showed slight mobility difference is the 30 nm fAuNP mixed with staples indicating staples might interact with 30 nm fAuNP. (b) Stained gel results 30 -10 -30 nm heterotrimer, the fluorescence signal (yellow-green band) of cage on the left lined up with the slow-moving pink band on the right.

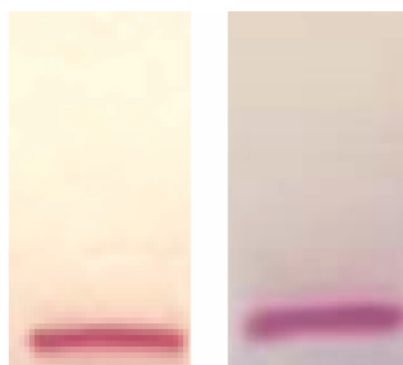

**Figure S9.** Agarose gel results of control experiments in 30 -10-30 nm heterotrimer assembly. Left: Mixture of 10 nm and 30 nm fAuNPs in TAB at molar ratio of 1:2, only 30 nm fAuNPs were visible. Right: Mixture of 30 nm fAuNPs and an origami cage with noncomplementary outside capture strands, only one unreacted 30 nm fAuNP band was visible.

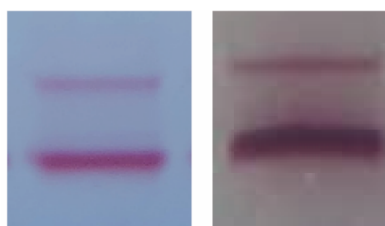

**Figure S10.** Effectiveness of thermal annealing in 30 nm fAuNP binding. Left: not thermal annealed. Right: thermal annealed. Both are characterized by agarose gel.

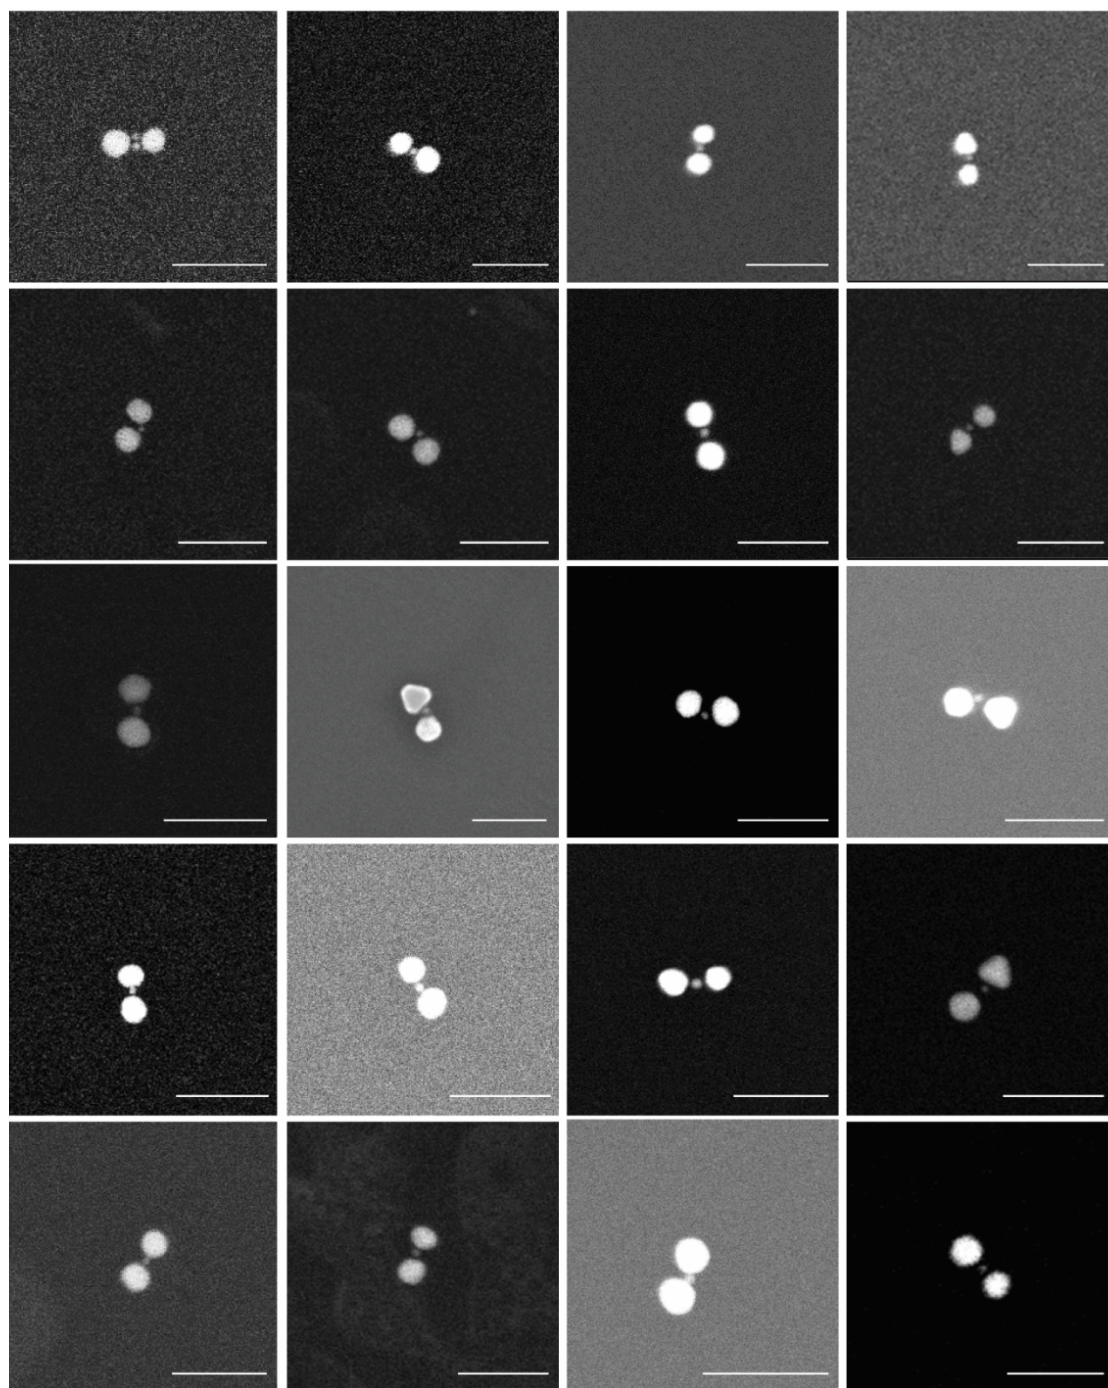

**Figure S11.** Additional SEM images of 30 -10 - 30 nm trimers. The leftmost one in the first row showed two 10 nm fAuNP flanked by two 30 nm fAuNPs. Scale bar: 100 nm.



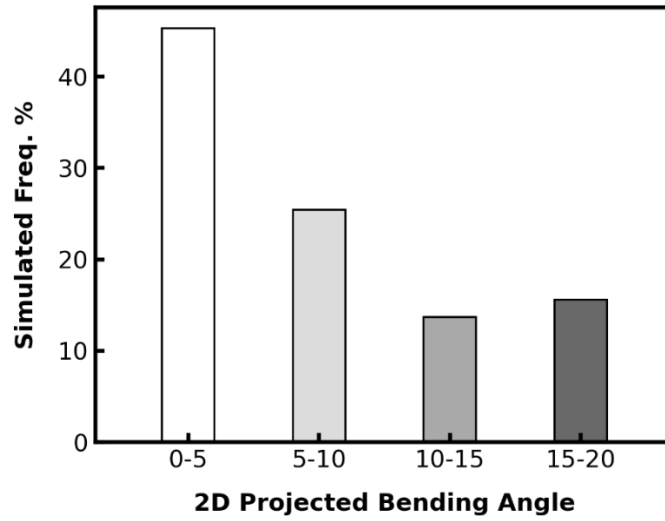

**Figure S12.** Simulated histogram of 2D projected bending angle of 30 -10 – 30 nm heterotrimers. Heterotrimers with 3D bending angles that have two populations with normal distribution:  $7.0^{\circ} \pm 0.9^{\circ}$  and  $18^{\circ} \pm 0.5^{\circ}$  could reproduce the histogram in Figure 4(c).

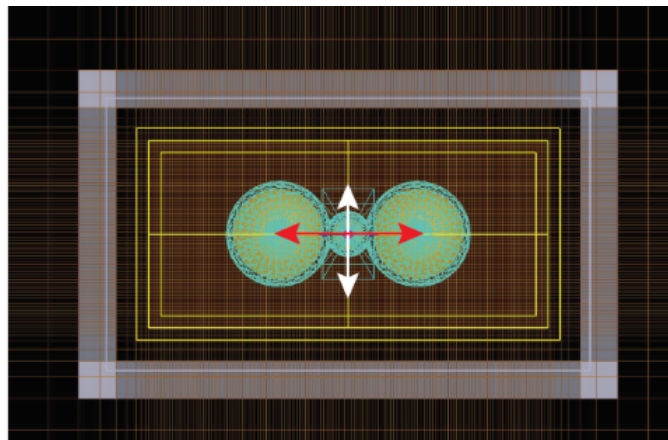

**Figure S13.** Set-up of FDTD simulation. Red and white double arrows indicated the longitudinal and transverse light polarizations used for simulations.

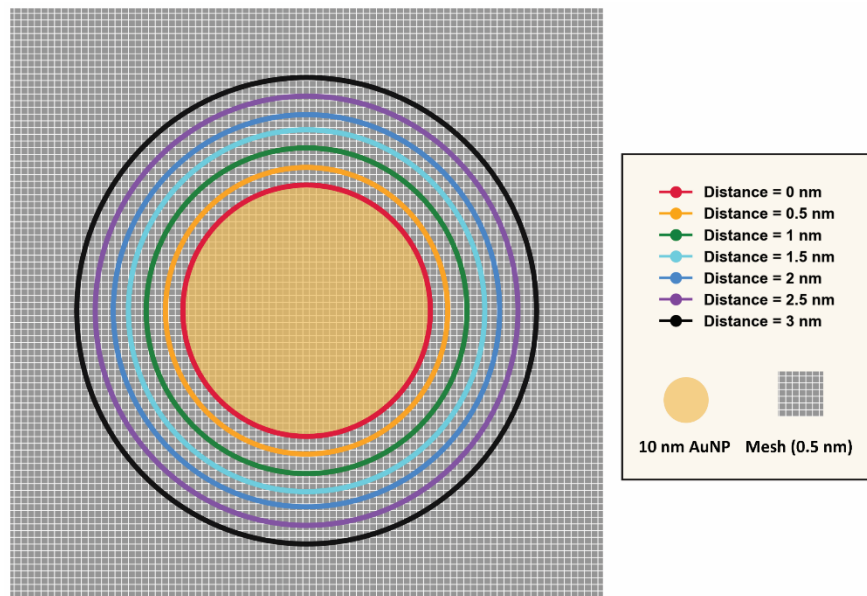

**Figure S14.** Illustration of FDTD electric field data extraction.

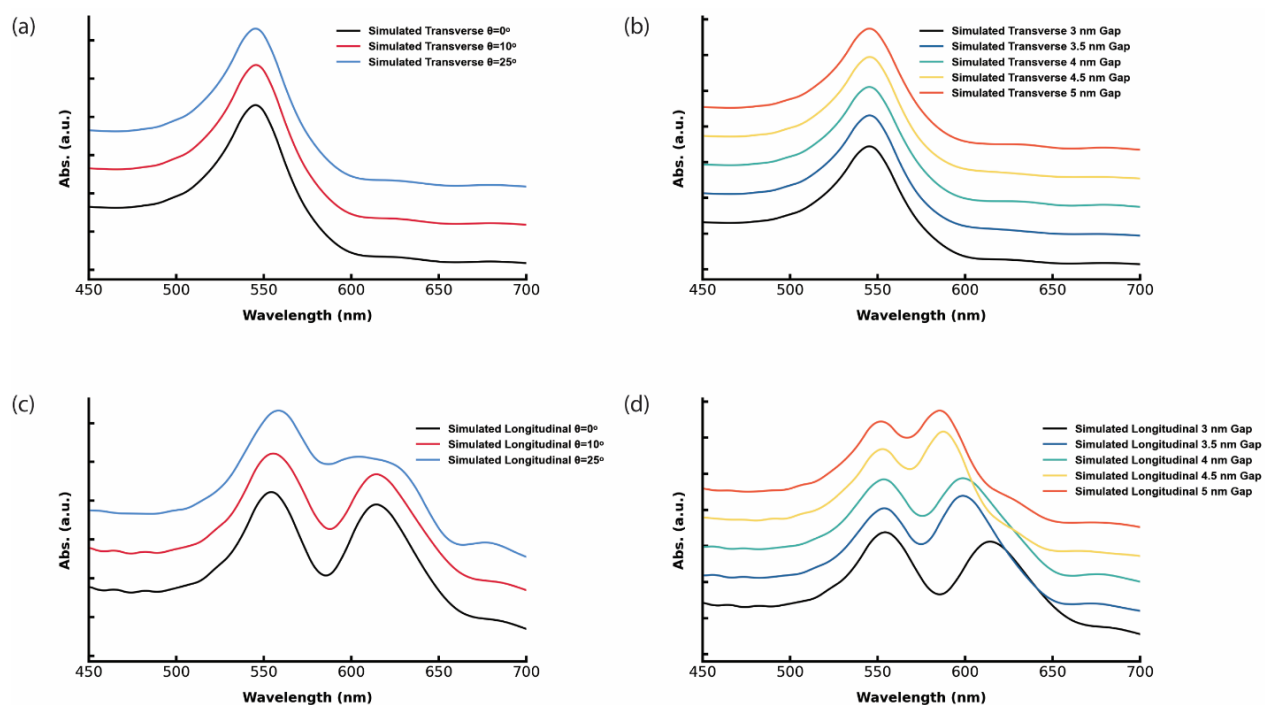

**Figure S15.** Simulated 30 - 10 - 30 nm heterotrimer absorption spectra. (a) Simulated transverse mode of heterotrimers (3 nm gap) with different bending angles. (b) Simulated transverse mode of heterotrimers ( $\theta=0^\circ$ ) with different gaps. (c) Simulated longitudinal mode of heterotrimers (3 nm gap) with different bending angles. (d) Simulated longitudinal mode of heterotrimers ( $\theta=0^\circ$ ) with different gaps.

The simulated transverse absorption spectra were independent of bending angles and gap distances (Figure S16a-b). The heterotrimer with a  $10^\circ$  bending angle only slightly deviated from perfectly aligned heterotrimer in simulated longitudinal absorption, while greater deviation and blue shift occurred to the heterotrimer with a  $25^\circ$  bending angle (Figure S13c). The longitudinal peak blue-shifted up to 10 nm as gap distances increased from 3 nm to 5 nm (Figure S13d). Besides various polarization angles in experimental measurements, minor gap and bending angle variations in heterotrimer could also produce an absorption spectrum as shown in Figure 6a.

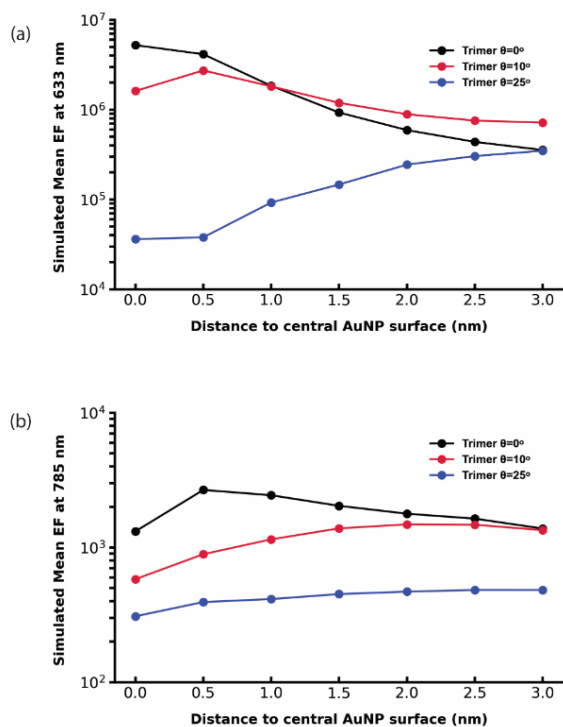

**Figure S16.** Bending angle dependence of simulated mean EF values of heterotrimer (3 nm gap) with longitudinal excitation at 633 nm and 785 nm.

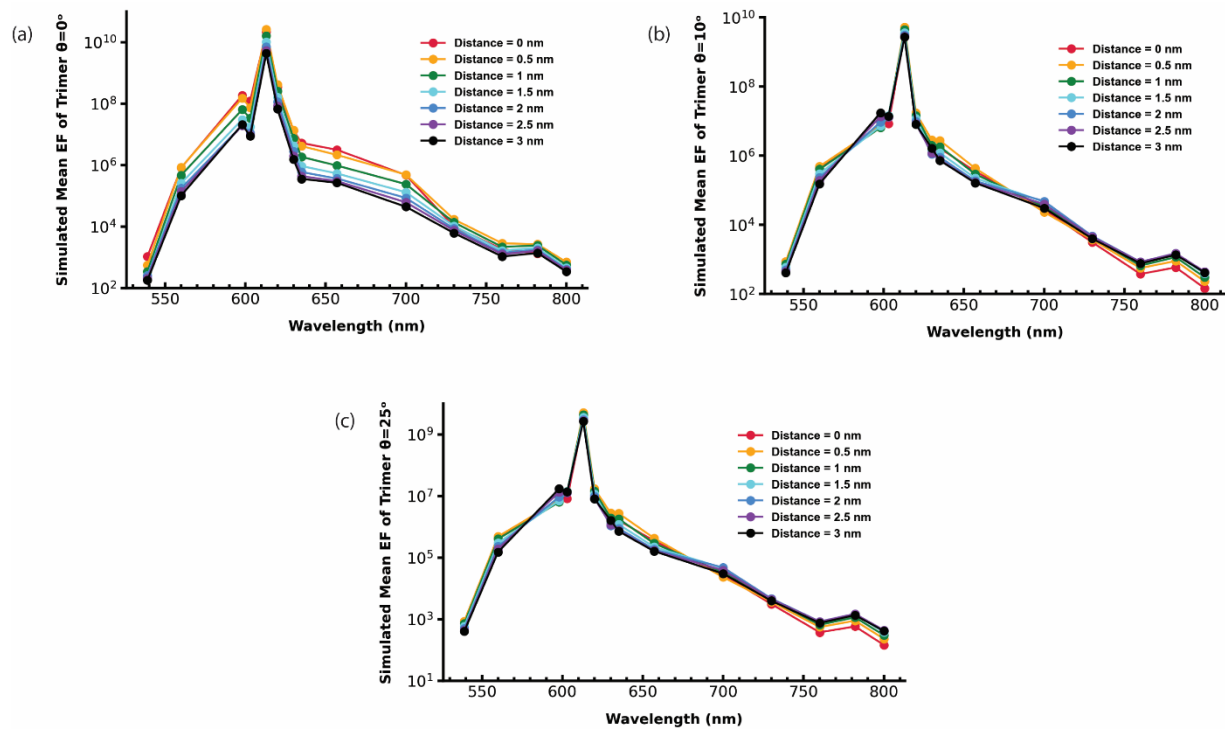

**Figure S17.** Simulated mean wavelength-dependent EF of trimers (3 nm gap) with different bending angles (a),  $\theta = 0^\circ$ , (b)  $\theta = 10^\circ$ , (c)  $\theta = 25^\circ$  and at different distances from surface of 10 nm AuNP. Laser polarization is parallel to trimer long axis.

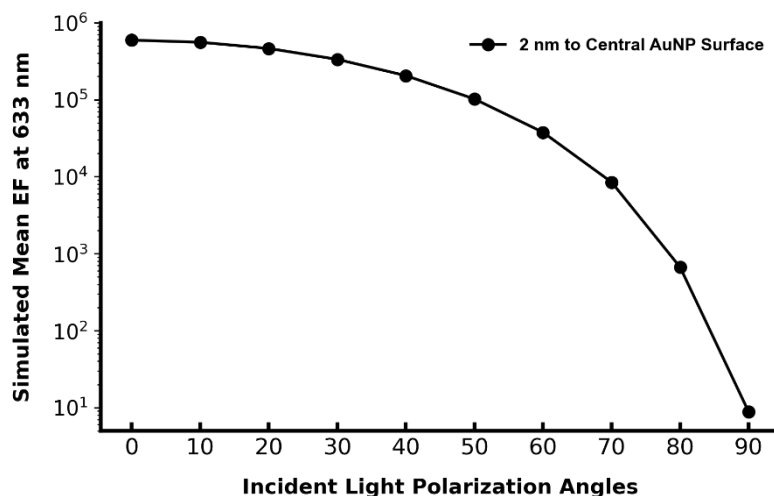

**Figure S18.** Simulated mean EF of heterotrimer (3 nm gap) as a function of incident light polarization angles.

Custom MATLAB code was employed to analyze electric field values exported from FDTD simulations of the heterotrimers, facilitating the calculation of mean enhancement factor (EF) values, which were subsequently illustrated in Figures S15-17. According to the data presented in Figure S16a, heterotrimers at bending angles ( $\theta$ ) of  $0^\circ$  and  $10^\circ$  exhibited the same trend: the mean EF decreased as the distance from the central AuNP surface increased. Conversely, the heterotrimer with a bending angle of  $25^\circ$  displayed a divergent trend, suggesting that a larger deviation from collinearity significantly impacts the plasmonic properties of the heterotrimer. Interestingly, Figure S16b shows that the three trimers followed similar patterns in their response to varying conditions. The experimentally observed average EF at 785 nm was  $1.12 \times 10^3$ , closely aligning with the mean simulated EF depicted in Figure S16b. Further analysis revealed in Figure S17 indicates that the incident wavelengths have a pronounced effect on the simulated EF values for the trimers: the mean EF peaked at the longitudinal LSPR wavelength (613 nm for  $\theta = 0^\circ$  and  $10^\circ$ , 604 nm for  $\theta = 25^\circ$ ) and decreased sharply as the incident wavelength deviated from the LSPR peak. Additionally, Figure S18 demonstrates the significant influence of the polarization angle of incident light on the simulated mean EF values.

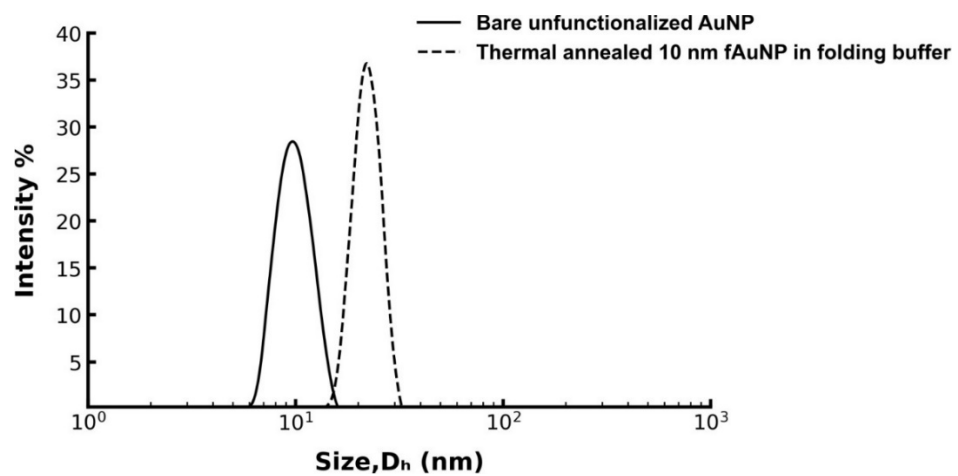

**Figure S19.** Additional DLS results. As received, unfunctionalized AuNPs have D<sub>h</sub> peak at 10 nm. 10 nm fAuNPs remained intact after thermal annealing in the folding buffer as shown by single peak at 22 nm.

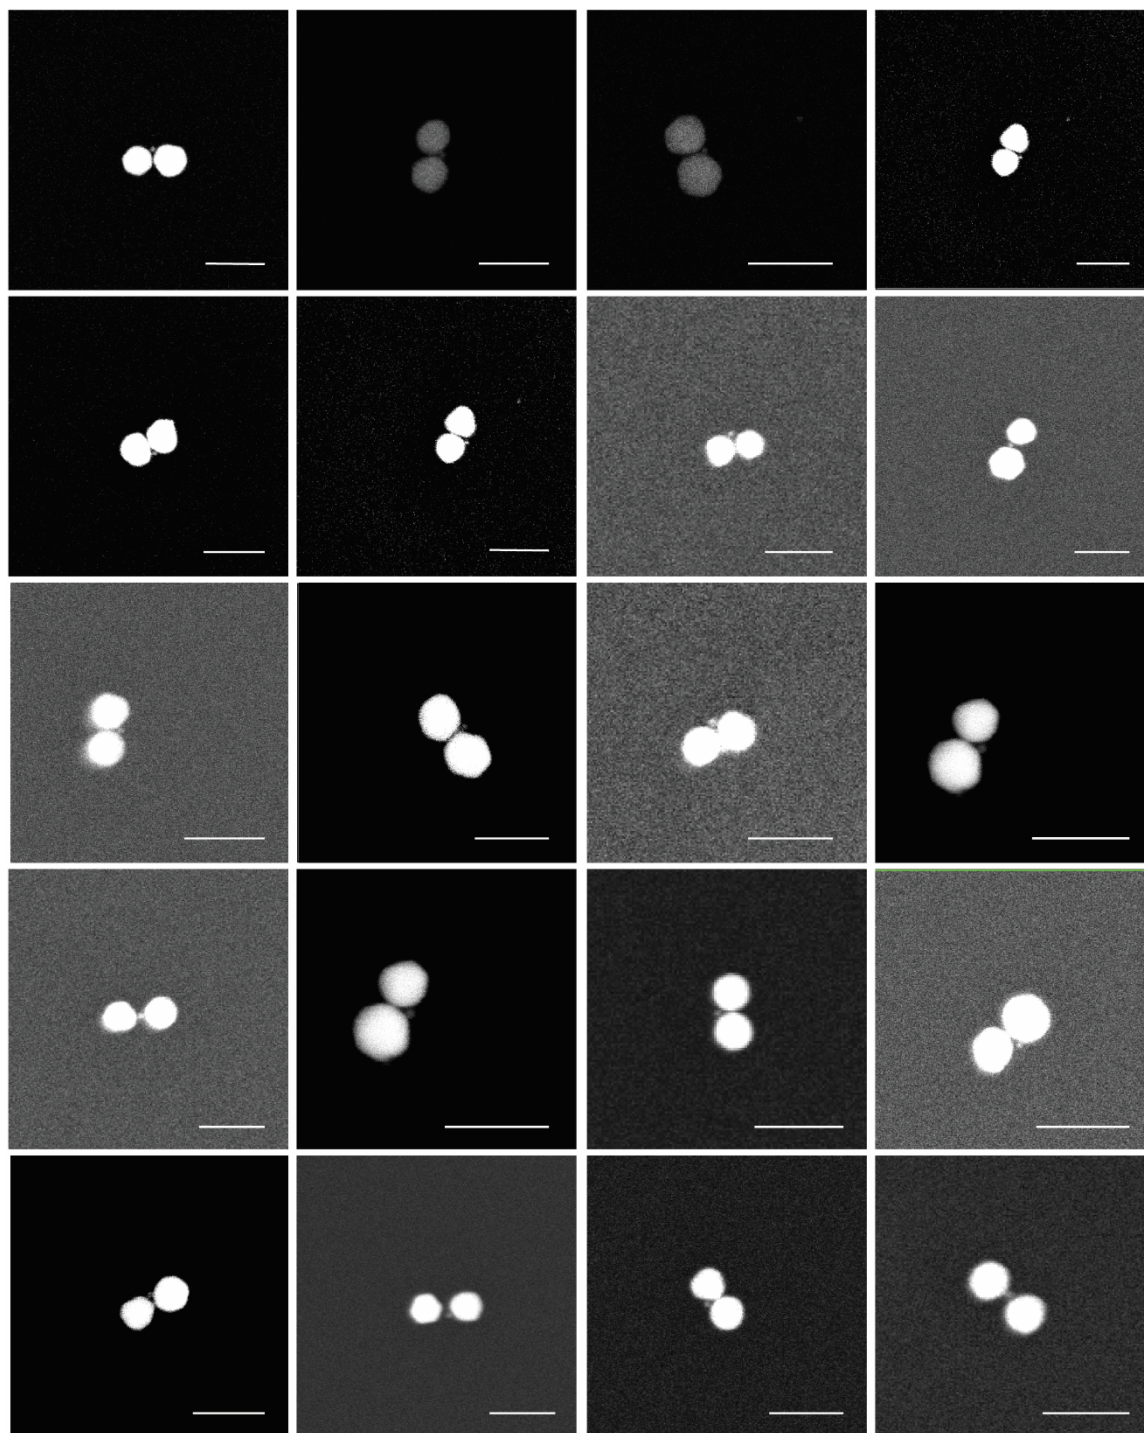

**Figure S20.** SEM images of 50 - 10 - 50 nm trimers. A backscattering detector was used. Scale bar: 100 nm.

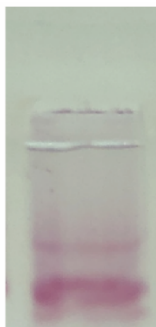

**Figure S21.** Agarose gel result of mixture of 30 nm, 50 nm fAuNPs and the cage-encapsulated 10 nm fAuNPs.

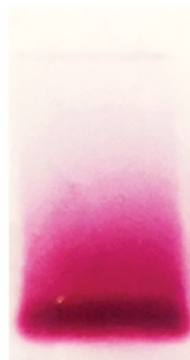

**Figure S22.** Agarose gel result of 30 - 10 - 30 nm heterotrimer assembly without NaCl and SDS adjustment.

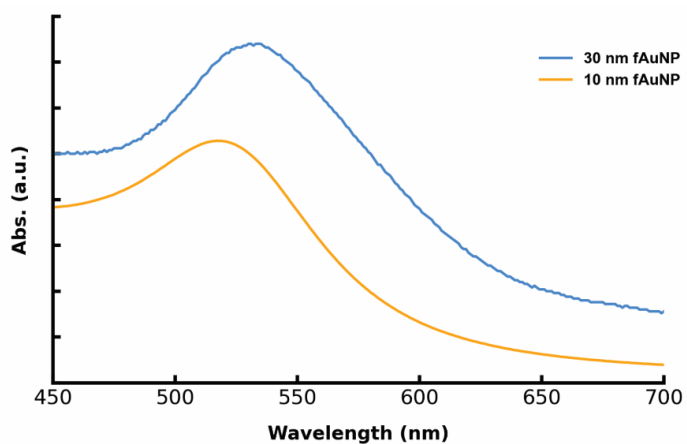

**Figure S23.** Experimental UV-vis spectra of 30 nm fAuNP (absorption peak at 532 nm) and 10 nm fAuNP (absorption peak at 523 nm).



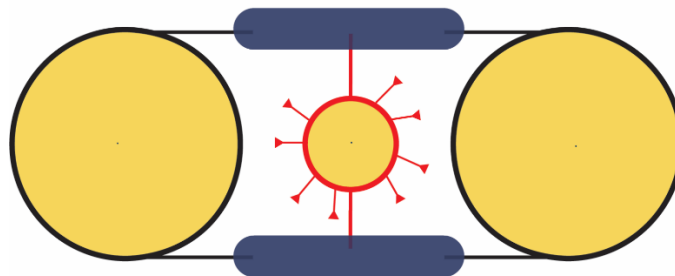

**Figure S24.** Schematic of heterotrimer contains TAMRA-tagged central nanoparticle. Black line: Outside capture strands; Blue round corner square: Origami cage; Red lines with triangle-end: TAMRA-tagged thiolated DNA ligands; Red lines without triangle end: inside capture strands, only two are shown for simplicity.

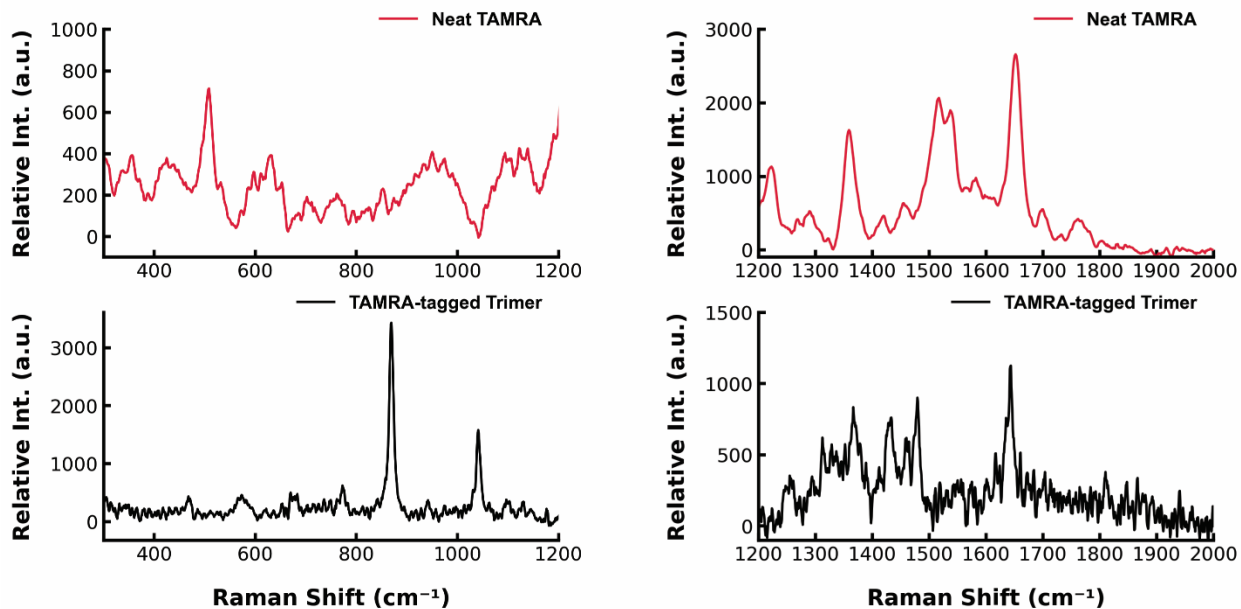

**Figure S25.** Full SERS spectra of heterotrimer that has TAMRA tagged in the central particle and Raman spectra of neat TAMRA at 633 nm laser excitation. The lower range from 300 to 1200  $\text{cm}^{-1}$  on the left and upper range from 1200 to 2000  $\text{cm}^{-1}$  on the right are shown separately for better peak resolution.

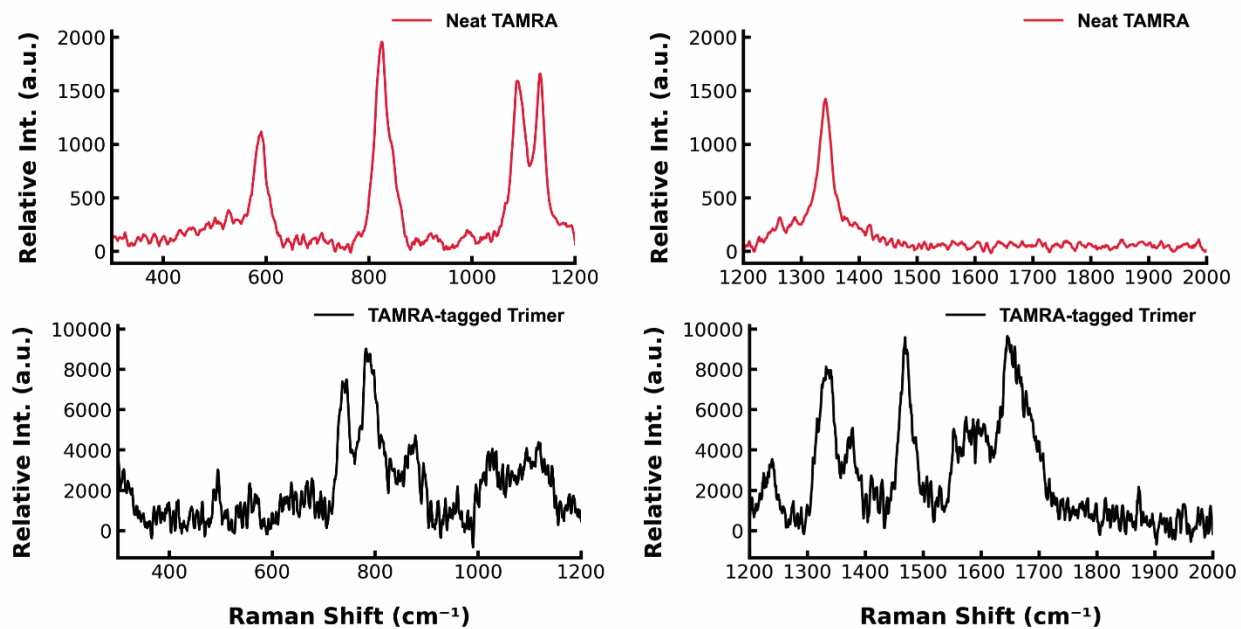

**Figure S26.** Full SERS spectra of heterotrimer that has TAMRA tagged in the central particle and Raman spectra of neat TAMRA at 785 nm laser excitation. The lower range from 300 to 1200  $\text{cm}^{-1}$  on the left and upper range from 1200 to 2000  $\text{cm}^{-1}$  on the right are shown separately for better peak resolution.

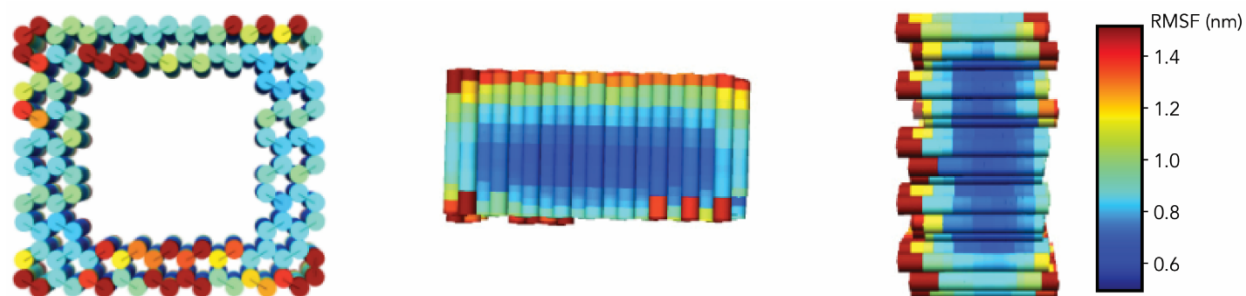

**Figure S27.** CanDo (<https://cando-dna-origami.org>) structure and local flexibility predictions of 3D hollow origami cage shown as a heatmap that indicates local root-mean-square fluctuations (RMSFs). Our cage displays good stability with maximum RMSFs value of 1.51 nm, and 95% red region (most flexible) RMSFs below 1.05 nm.

| Helix | Sequence (5' to 3')                                                        |
|-------|----------------------------------------------------------------------------|
| #39   | <b>gtaaattgcggaat</b> TTTTTCAGGTCATTCGCAAACCTGTT                           |
| #105  | TGAAAGTAAGAACGGGTATT <b>gatgtgcctcactacg</b>                               |
| #38   | TGAAAGTAAGAACGGGTATT <b>gatgtgcctcactacg</b>                               |
| #106  | <b>gtaaattgcggaat</b> TTATCACCAGTAGCCAATGAAACC                             |
| #38   | TTGCTCCTTTTGATAAGCATACATTTAGAATACCAAAAACGTAGATT<br><b>gatgtgcctcactacg</b> |
| #106  | TGAAAGTAAGAACGGGTATT <b>gatgtgcctcactacg</b>                               |

**Table S1.** DNA sequences of outside capture strands. Extensions are in bold lowercase. The two strands having 3' end extensions are for 30 -10 -50 nm trimers only. 50 nm IPT has no outside capture strands.

| Helix | Sequence (5' to 3')                                     |
|-------|---------------------------------------------------------|
| #73   | <b>taatcagcgtttcc</b> TTTTAAGGCACCCCAGCGGCGCGAAGCGACCT  |
| #41   | <b>taatcagcgtttcc</b> TTTTTCGCGAGCATGCCTGGAAAGGCTCAACCG |
| #96   | <b>taatcagcgtttcc</b> TTTTTAAATGTTCTGTATTTAACAGCCGAA    |
| #31   | <b>taatcagcgtttcc</b> TTTTATTCAAGACTCCCCCATTAGGCCATTT   |

**Table S2.** DNA sequences of inside capture strands. Extensions are in bold lowercase.

| AuNP Size | Sequence                 | Notes |
|-----------|--------------------------|-------|
| 10 nm     | GGAAACGCTGATTATTTT 3'-SH | -     |

|              |                                          |                                  |
|--------------|------------------------------------------|----------------------------------|
| 10 nm        | GGAAACGCTGAT <i>(TAMRA)</i> TATTTT 3'-SH | TAMRA attached to a T            |
| 30 nm/ 50 nm | 5' ATTCCGCAATTTACTTTT 3'-SH              | -                                |
| 30 nm/50 nm  | SH-5' <i>TTTT</i> CGTAGTGAGGCACATC       | For 30nm-10nm-50nm Heterotrimers |
| 30 nm        | 5' TAATCAGCGTTTCCTTT 3'-SH               | For Figure S4b                   |

**Table S3.** DNA sequences of thiolated DNAs. 4 italic Ts are spacers, not used for hybridizations.

| #  | Sequence (5' to 3')                                |
|----|----------------------------------------------------|
| 1  | TTACAAAGCTGTAGGGTGTCTAATTCTG                       |
| 2  | ACAGGAACGGAATTTTGTGGGGATGTGTAAAACGCCAAGC           |
| 3  | AGGCCTACCCCTTATAAAGGTAACCGAT                       |
| 4  | AATAATAATTTACTACCAGGTTAGGATTAGCGGG                 |
| 5  | ATTACTAGTTTAGTATATACAAGTAATTTTCGCCATAAAGGTAGTCCAGA |
| 6  | CGAACGAACAGGCAGTAGCATTTTGGGG                       |
| 7  | ACCGAAGCCCAATAATTATTT                              |
| 8  | ACAACATAATTGTTATGATATCGGAGAC                       |
| 9  | ACTCCTCATTACCCAAAGTAAGACACC                        |
| 10 | TCAGATATAGAAGGCTTCTAAGAACGC                        |
| 11 | GCCCTAATTA AAAA ACCACCAAGTATGT                     |
| 12 | ATAAAGTACCGACAGTAGTCACCAATTTAACCTAGGGCACAGTCC      |
| 13 | TAGTATTATCCGTCCAGGGAACGGGAGAGCCAAAG                |
| 14 | TGTTTCAGCTAATGCAGATTATCAAGTATCACGATATAAGTATAGC     |
| 15 | TGTAGCATGTACCGGAACA ACTGAAAATATTGTATCGGTTTATCA     |
| 16 | TTTTAACAAGAGAATATCGCATTA ACT                       |
| 17 | ACAAAGCGTGAATAGGTTTAAAATCATT                       |
| 18 | AAAAATGGAAAATAATTACGCGCAGAAG                       |
| 19 | GTGCCCGTACTCATCGAGCCGTTT                           |
| 20 | CGAACGTACCAGAATCAGGCTCTGGCGA                       |
| 21 | AAGGAATATAAAAAGAGAGGCATAGCGTC                      |
| 22 | CTGAGAGAGAGGTGGATTAAG                              |
| 23 | TTTTGAAAATAAGACAGCCATATAAGAGCACAAGATGTACTGTACATGG  |
| 24 | TTTAAATGCATGAAAAGTTCTACTTAGAGCTATATAATATCGCGCAGA   |
| 25 | AGAAGGATTTTGTTCGACTTGACAATTT                       |
| 26 | CGGCTGTCATTCCATTAAGAACCTATTATTCTGA                 |
| 27 | ACGGATTTCGCTGATTGAAGATTAGTCAGTATAGTTTACTTAAC       |
| 28 | GCCTGATAAATTGTGTCGGAACGATGACCAATTGAGAT             |
| 29 | ATAGAAAATTTTCATATTACCGCGTTAGAGCGCACCGAGAGAA        |
| 30 | CGCCAGCCCACCAGCCACCCTACCGGAACCGCCTC                |
| 31 | TGCCCCGCGAAACCATCCTGAATCATCAAGAAACCTATTAATCGTATTA  |

|    |                                                     |
|----|-----------------------------------------------------|
| 32 | TGCAACTGGAAGCAGATTAAGAAAGATG                        |
| 33 | GCTTTCGAGGCATCGCCGATATATTCGGTCTGCGGGAAACGAGG        |
| 34 | GTTATCTTAGGAGCGCATCGTAAC                            |
| 35 | AAAAGGAAGCTTGATGCGCCGCTTGCAG                        |
| 36 | ATTCAAACGGTTGTAAATCATGTAGATT                        |
| 37 | TTTCCAGAGCCTGAACAGTAATTGGGGAAGGCGGAAATAGAGCCAGCA    |
| 38 | TAGCAATGGAAAGGTAATAAGAAACGCTCCTACAT                 |
| 39 | GGGCCTGAAAAAAGTAAACACCAACCAA                        |
| 40 | ATTGCATTAATACTAAGCCTT                               |
| 41 | TAAGAATAACAATATCTATTAGGCGAACT                       |
| 42 | ATGCCACAGACAGACGGCTAATTAAAGGC                       |
| 43 | TTTACAAACAATTCGATTTAGTGCCGGAGCCAGCTTTCCGGC          |
| 44 | ACGTCACACCATTATCATTAAACGTTCC                        |
| 45 | TAAGGCGTTACCAGACGCTCATTAATTGGCCACCCGACAATAAAC       |
| 46 | CAGTATTGCAACAGAACGCCATTTCGCGTCTGGCCTGAGCGAGCGGGCGGA |
| 47 | AGTTGAAGATTAGAGTCACGTGACAGTA                        |
| 48 | AACGCAACATAAAGTAAATCACACGCCAAACATAACAAATGCTCTTTAC   |
| 49 | GCAACTTGAGAATCAATCCAACCTAACGA                       |
| 50 | TGAATTTAGGACTAGGGTAAAAAACGAA                        |
| 51 | CCAGACCAAAGTACCTCAACATTTTGCG                        |
| 52 | CTTAGCCGAAATCCACAAAGTGTAGCAA                        |
| 53 | ATGGATTACAGATTCCGACCAGGACATTCAGATAGACCTGAAA         |
| 54 | TTTTAAGAATAATACAATCCAGCCTTAAATC                     |
| 55 | GGAATACCACATTCTTCATCATTAAATAAAGGACGTTGGGAAG         |
| 56 | AAACGAGAATCAAAGACGACGTACGAGGGCAGATA                 |
| 57 | GAACACCCTAATTTAAATAAAAACGATTAACCGAGCTGGCATAGGCGGT   |
| 58 | GGTTTACCGGGTCTTAATGCTTTCGGAGGCTGAG                  |
| 59 | TTCATTAGAGAAACGTAGTAAGCGATTT                        |
| 60 | TGAAAGTAAGAACGGGTA                                  |
| 61 | GGGTCGAGTGCCAGAGTAGCGGCCGAA                         |
| 62 | AGGCTTGAGAAAGAACTAATCATAGTA                         |
| 63 | AGAACGCTTTCAAATTAATTCGGAATC                         |
| 64 | CCTCAGAGAATTAGGATTCCCGGAAGTTAGCTTCA                 |
| 65 | TTTTTGTAATACAATGCAAATATAAAGGCCACAG                  |
| 66 | AGAGGCACTAAAACAGATTTGTAT                            |
| 67 | GGCAAATTGAAAATAATGGGTCAACAT                         |
| 68 | GCTAAATAGGGTGAAGTAATGGATAAAA                        |
| 69 | GCTGCAAACGCCAGGCGCAACCAAAGCGATAATAC                 |
| 70 | CGTAATCACGCAAGTGTAGGTATTTTCA                        |
| 71 | AGTACATCCTTTATAACTCCAACATATA                        |
| 72 | TCTTTTCCGCGCGGCCAGCTGTGCGTTGAATGAGT                 |
| 73 | TACCAACCCAGCTCGGGAGG                                |

|     |                                                     |
|-----|-----------------------------------------------------|
| 74  | AGAGCAAACCCTCGTTTTGCCATAGTAAAATGTTTCATAAAATGTTTCAGA |
| 75  | CCTTATTTTCATCGGAGAGCCGATTGACA                       |
| 76  | TGAGGGAAGCGCTAGATAACCCAAGAAA                        |
| 77  | GCCACCCACCCCTCCATTTTCAATCAAG                        |
| 78  | AATCATAGGTTTCGCAAGTATGTAATTCTGACTGGTTTGCCTGTGAT     |
| 79  | TGCTCAGGAGCATGTCAATAAT                              |
| 80  | GACATTCGAATTATGACTTGACACCTTATCTTTAGACATCCT          |
| 81  | CCTTTTTAGTACATAAAAT                                 |
| 82  | TAATTTTTTCACGTTAAAGGAACAACCTTAATTTTCTGTATGG         |
| 83  | TAGCTATAACCCTGTATGAAGTTAATGCCGAATAA                 |
| 84  | GTTTGAGATTTTGAAGGGCGGCCTCTT                         |
| 85  | AATACCCAAAAGAAGAAACGCAAAAGTACTATCTT                 |
| 86  | AATTATTCATTTCAATTCCGAAAGAAGCGAA                     |
| 87  | CCAAAAAATTACAAAACAACATCAAGAACAGTACGGGAGAAAC         |
| 88  | ATAAAAGAGTCACAACCTTTACACAATAGCAAGC                  |
| 89  | CCCTGACCCCAAATCTTGACA                               |
| 90  | ATAAAACCCAGCAGGCTCATTGCCAGCTT                       |
| 91  | AACCAAGTACCGTCACCCACCGCATAAACAGAGTGCCTTGAGTAA       |
| 92  | GATGGGCACTAACAATTTGAGGACAACCTTTTAAAA                |
| 93  | AGAAGGACGGATAAGAGGGTTCGGCCAC                        |
| 94  | GAATCGTAGACTGGTTTTGCATAACGGATACAGGT                 |
| 95  | AGAACCGTGACAGAAGAGGCACATGTTA                        |
| 96  | TATTTCAATTAGCTGAGGGGGAAATTATTTGCACG                 |
| 97  | TAGGGCACAAATATTCATATTTATTTT                         |
| 98  | GCCACCAGAGTTTCCAAACTAAGTTTTG                        |
| 99  | CAAACCCTCAATCATTGCTGAGAACAATAACAACCCGTCGG           |
| 100 | TACCGTCTTAAATATACCGACAAATACG                        |
| 101 | TAACATCAGGTCATTGTTTTACTTTGAACAAAAGA                 |
| 102 | ATTATTCATGCTGAGATTGGGTTAGGTA                        |
| 103 | ATAGCAGCACTTAGCGTCGCGTTTAGCGTTTGCC                  |
| 104 | TAGAAAGTAACACTCCCTCAT                               |
| 105 | GGAAGCAAGCCTGGCGACGTT                               |
| 106 | TATTCCTTCACCGCTGGTTTT                               |
| 107 | TTAGAACGGTCATTCTGGAGCATCGATGGTAAAACATCATAT          |
| 108 | CCCGGTAAAGCCCAAGATTGTATTTAA                         |
| 109 | TTTGGGCCGTATTGATAGTCGTTTCCAC                        |
| 110 | TCATTATACCTTATATTGGGCCTTTGAA                        |
| 111 | GCATCAAAGGAAGCACCTGAGTACCAAG                        |
| 112 | GGCAATTCATAAGTTGGGGTTTTTCGTCGACTCTA                 |
| 113 | GACGTTAGATCTAACAACGCC                               |
| 114 | GGCTTTGCTTAAACGCCTTTACTCCAACTACCAGCCGGACAATAGCCC    |
| 115 | CATCTGCCAGTTTGGAGGCACTCCAACCAGGTGTTGGGGGAACAA       |

|     |                                                   |
|-----|---------------------------------------------------|
| 116 | GGGAATTTATTCATAGCGTCAGTAATAAG                     |
| 117 | CGTCAGACACCCACTCAGAACCTCAGGAGGTTTAG               |
| 118 | TTCCATAAATGATATACTGCG                             |
| 119 | ATCCAGTGACGGCACTACCATTTCTGAATAATGGA               |
| 120 | TTGCTCCTTTTGATAAGCATACATTTAGAATACCAAAAACGTAGA     |
| 121 | TCGGCCAAACCAGTGCAGCTGATTGCCCTGATTATCAGA           |
| 122 | ATCCCCGGGTGAACCCTCAT                              |
| 123 | TTTCAGGAAAATCAAGCCACCCAGAACC                      |
| 124 | CTCATAGTTAGCGTAAACGTAAATGTCAACAGCAACAAC           |
| 125 | TCGAGCCTTTTCGTCCAACATATATAGT                      |
| 126 | ACTAATAAGGAATTGTCAGTT                             |
| 127 | ACTTCAAAGCAAATCTTTACTTAAACAATTCATTGAATCCC         |
| 128 | ATTGTAATAAAGCATCATAGCTGATAAA                      |
| 129 | AGTTTCCATTAAACAAGACTTGCATCGGTTCGTCACCCCTCAGC      |
| 130 | CGGTTTGGCCAGGGCATTGCA                             |
| 131 | TGAACGGTTTGACCCAACCTAATACGTA                      |
| 132 | TATCAATAAGAGAGCGATAGCTGATAGC                      |
| 133 | GCAATAGAGCAGATCAATAGGTGCCACGCATCACCATATCTGGAGGAAG |
| 134 | TCAGATACGCCACCAAAAAGGAAGAGAA                      |
| 135 | ATATATGTGAGTTAGATT                                |
| 136 | CAAAATTTAACCTTATCGTCGATTTTCC                      |
| 137 | AATCCTTTCAATAGCCATTCGCCTCAGG                      |
| 138 | ACAACGGACTCATCTGTACAGGAGTAATCAACGTA               |
| 139 | GATGGCTAATAGTAAGGCAAAGCATAAA                      |
| 140 | GAATTTAAGCCAGATCACAACAGGTCA                       |
| 141 | CGCTTTGCTGAGGACAATGATTTTCAGCGGAGTCGCTTTCCA        |
| 142 | ATTTTTAACCGAGCTGTGTGAACGAGCC                      |
| 143 | TTCTAGCTGTTTCCTCGAATTTTGCATG                      |
| 144 | TTAGTTGCTATTTTGCACGCTAACGAG                       |
| 145 | CCTGCAGCCAGTCAGGTGCCTCGCTCAC                      |
| 146 | ACAGAGAATTTTGAAGGCT                               |
| 147 | TTTCATAATCGATAGCAGAACCCATTCCACAGAC                |
| 148 | CGTGCGTGTCTGAACCCTCC                              |
| 149 | CGAAACTAATGAAACAATTTCAATTTGA                      |
| 150 | ACCAGGATGAAAACCCAATTACTATTA                       |
| 151 | ACGCTGAGAGTGAATTTA                                |
| 152 | ATCCCAGGGCCTGTACGCGTCGAACCGC                      |
| 153 | ACAAATACAATGGGAATTACAGCCAGAACTGAATCT              |
| 154 | TTTGCTCGTAATCGTTGAGGCAAATAA                       |
| 155 | GTGAATTACCAGTCAACGAACAAAGAAGTTTACCAAATCAGGGCGGATT |
| 156 | AAAGAGAAAACAGGGAATTGGTTTACTTACGCTCAATCGTCT        |
| 157 | CATAACGATATTATACAACAGAAGCTGGC                     |

|     |                                                  |
|-----|--------------------------------------------------|
| 158 | AAGATCGGGACGACTGGTGTATTGACCGTCTAAAG              |
| 159 | CTGACCTTCATCAAACCAGGCACCGAACGGCGCAGACGGTCA       |
| 160 | GAATCCTGAGACTACTCCGGCTTATATA                     |
| 161 | CGCTATTGGCGATTCAATATATGTCGTGGGAGAGG              |
| 162 | TCTCAGAGATAAGGCCTGTCA                            |
| 163 | CGTTTTAGCGAACCTCCTAACGTCTAACATAAATAAGT           |
| 164 | TAGTCAGATATCGCGTTT                               |
| 165 | CACATTAATCATTAATGATT                             |
| 166 | TTCAGAGCCGCGACGATTGGTT                           |
| 167 | TAATTCGTCATTCCATTT                               |
| 168 | CTTCTGGAAGTATTTTATCTTAAAATTT                     |
| 169 | TTTTTGTAGCAGACTTTT                               |
| 170 | AACAGTTCAAAATTTTATCAAGTGGCTT                     |
| 171 | TTAAATCTACGGTTGAGA                               |
| 172 | TTCAGATGAAGGAGAGTACCT                            |
| 173 | CATCAATATCCGCTCATT                               |
| 174 | TTGCAGTCTCTCTTTTGATGTT                           |
| 175 | TTTTGAATCCGTAGTTT                                |
| 176 | TTGGAATAGGTCAATAGAACAAGAAA                       |
| 177 | TTTCTCCGTGGACCTCAAATTT                           |
| 178 | TTTGTAACGTTTAAAATTTTTGTGTGGCAAAAACGTAAAAATAGCATT |
| 179 | TTATACAGGAGATTGAGT                               |
| 180 | TTCCTTGATATATGGAAAGCTT                           |
| 181 | TAAGGGAGCATAGGCTTT                               |
| 182 | TTCGAAAGACATTCATGAGTT                            |
| 183 | TTTCAGAGCCGAACCACCTT                             |
| 184 | TTTTAGAGGAAGTCTTTT                               |
| 185 | TTTTTTGCTAAATTGCGAATTT                           |
| 186 | TTCAATCCACGAGCTAACTTT                            |
| 187 | AGAGGCAAGTAATAAGAGATT                            |
| 188 | TTTCAAATGCTCCTGACT                               |

**Table S4.** DNA sequences of unmodified staples.



| Neat TAMRA 785 nm     | Neat TAMRA 633 nm     | Trimers 785 nm           | Trimers 633 nm           | Origin | Assignment <sup>[1-5]</sup>            |
|-----------------------|-----------------------|--------------------------|--------------------------|--------|----------------------------------------|
| 649 cm <sup>-1</sup>  | 1652 cm <sup>-1</sup> | 1647 cm <sup>-1</sup>    | 1642 cm <sup>-1</sup>    | TAMRA  | C-C stretch xanthene ring              |
| -                     | 1582 cm <sup>-1</sup> | 1586 cm <sup>-1</sup>    | -                        | TAMRA  | C=C ring stretch                       |
| 1567 cm <sup>-1</sup> | 1562 cm <sup>-1</sup> | 1554 cm <sup>-1</sup>    | -                        | TAMRA  | N-H bend                               |
| 1534 cm <sup>-1</sup> | 1537 cm <sup>-1</sup> | 1529 cm <sup>-1</sup>    | -                        | TAMRA  | amide II                               |
| 1515 cm <sup>-1</sup> | 1517 cm <sup>-1</sup> | -                        | -                        | TAMRA  | C-N stretch, C-H bend, N-H bend        |
| 1509 cm <sup>-1</sup> | -                     | -                        | -                        | TAMRA  | ring vibration, C=C in plane vibration |
| 1498 cm <sup>-1</sup> | -                     | -                        | -                        | -      | -                                      |
| 1455 cm <sup>-1</sup> | 1455 cm <sup>-1</sup> | 1469 cm <sup>-1</sup>    | 1477 cm <sup>-1</sup>    | TAMRA  | ring vibration                         |
| 1414 cm <sup>-1</sup> | 1417 cm <sup>-1</sup> | 1415 cm <sup>-1</sup>    | 1433 cm <sup>-1</sup>    | -      | N-C stretch                            |
| 1356 cm <sup>-1</sup> | 1360 cm <sup>-1</sup> | 1376 cm <sup>-1</sup>    | 1366 cm <sup>-1</sup>    | TAMRA  | C=C stretch xanthene ring              |
| 1287 cm <sup>-1</sup> | 1289 cm <sup>-1</sup> | 1333 cm <sup>-1</sup>    | -                        | TAMRA  | N-H bend, CH <sub>2</sub> wag          |
| 1266 cm <sup>-1</sup> | 1267 cm <sup>-1</sup> | -                        | 1253 cm <sup>-1</sup>    | TAMRA  | C-O-C stretch                          |
| 1219 cm <sup>-1</sup> | 1223 cm <sup>-1</sup> | 1235 cm <sup>-1</sup>    | -                        | TAMRA  | -                                      |
| 1189 cm <sup>-1</sup> | 1190 cm <sup>-1</sup> | -                        | -                        | TAMRA  | -                                      |
| -                     | 1123 cm <sup>-1</sup> | 1118 cm <sup>-1</sup>    | 1129 cm <sup>-1</sup>    | TAMRA  | C-H in plane bending                   |
| 962 cm <sup>-1</sup>  | -                     | 962 cm <sup>-1</sup>     | -                        | -      | -                                      |
| -                     | -                     | 866 cm <sup>-1</sup>     | 869 cm <sup>-1</sup>     | DNA    | P-O5 + ribose ring breathing           |
| 842 cm <sup>-1</sup>  | 852 cm <sup>-1</sup>  | -                        | 842 cm <sup>-1</sup>     | TAMRA  | -                                      |
| -                     | -                     | 782 cm <sup>-1</sup>     | 785 cm <sup>-1</sup>     | DNA    | Poly(dG-dC)                            |
| 757 cm <sup>-1</sup>  | 762 cm <sup>-1</sup>  | -                        | 772 cm <sup>-1</sup>     | TAMRA  | C-H bend out of plane                  |
| 739 cm <sup>-1</sup>  | 742 cm <sup>-1</sup>  | 739/745 cm <sup>-1</sup> | 736 cm <sup>-1</sup>     | TAMRA  | -                                      |
| 698 cm <sup>-1</sup>  | 702 cm <sup>-1</sup>  |                          |                          | TAMRA  | -                                      |
| 677 cm <sup>-1</sup>  | 674 cm <sup>-1</sup>  | 677 cm <sup>-1</sup>     | 670/677 cm <sup>-1</sup> | DNA    | Thymine                                |
| -                     | 652 cm <sup>-1</sup>  | 656 cm <sup>-1</sup>     | 653 cm <sup>-1</sup>     | TAMRA  | C-H out of plane bending               |
| 642 cm <sup>-1</sup>  | 630 cm <sup>-1</sup>  | 637 cm <sup>-1</sup>     | 636 cm <sup>-1</sup>     | DNA    | C3'endo anti-thymidine                 |
| 627 cm <sup>-1</sup>  | 628 cm <sup>-1</sup>  | 625 cm <sup>-1</sup>     | 621 cm <sup>-1</sup>     | DNA    | Guanine + ribose ring breathing        |
| 610 cm <sup>-1</sup>  | 610 cm <sup>-1</sup>  | 617 cm <sup>-1</sup>     | -                        | TAMRA  | aromatic C-C stretch                   |
| 570 cm <sup>-1</sup>  | 572 cm <sup>-1</sup>  | 573 cm <sup>-1</sup>     | 572 cm <sup>-1</sup>     | TAMRA  | -                                      |
| 555 cm <sup>-1</sup>  | -                     | 557 cm <sup>-1</sup>     | -                        | -      | -                                      |
| -                     | 532 cm <sup>-1</sup>  | 532 cm <sup>-1</sup>     | 532 cm <sup>-1</sup>     | -      | -                                      |
| 500 cm <sup>-1</sup>  | 506 cm <sup>-1</sup>  | 493 cm <sup>-1</sup>     | -                        | TAMRA  | -                                      |
| -                     | -                     | 486 cm <sup>-1</sup>     | 486 cm <sup>-1</sup>     | DNA    | -                                      |

**Table S5.** TAMRA peak positions and assignments. 633 nm and 785 nm excitation wavelengths.

|                                  | Mean Value | Standard Deviation |
|----------------------------------|------------|--------------------|
| Diameter of Large AuNP in Trimer | 29.4 nm    | 2.8 nm             |
| Diameter of Small AuNP in Trimer | 7.9 nm     | 0.9 nm             |
| Gap Size                         | 3.7 nm     | 1.5 nm             |
| Bending Angle                    | 9.7°       | 6.9°               |

**Table S6.** Statistical summary of SEM image analysis of 30 -10 – 30 nm trimers.

|                           | Mean Value | Standard Deviation |
|---------------------------|------------|--------------------|
| Diameter of Terminal AuNP | 46.3 nm    | 3.8 nm             |
| Diameter of Central AuNP  | 7.7 nm     | 1.4 nm             |
| Gap Size                  | 3.5 nm     | 1.8 nm             |

**Table S7.** Size measurements of 50 -10 - 50 nm heterotrimer.

### Supporting References

1. Gong, T.; Kong, K. V.; Goh, D.; Olivo, M.; Yong, K. T. Sensitive surface enhanced Raman scattering multiplexed detection of matrix metalloproteinase 2 and 7 cancer markers. *Biomed Opt Express* **2015**, *6* (6), 2076-2087.
2. Prinz, J.; Heck, C.; Ellerik, L.; Merk, V.; Bald, I. DNA origami based Au-Ag-core-shell nanoparticle dimers with single-molecule SERS sensitivity. *Nanoscale* **2016**, *8* (10), 5612-5620.
3. Prinz, J.; Matković, A.; Pešić, J.; Gajić, R.; Bald, I. Hybrid Structures for Surface-Enhanced Raman Scattering: DNA Origami/Gold Nanoparticle Dimer/Graphene. *Small* **2016**, *12* (39), 5458-5467.
4. Yang, J.; Palla, M.; Bosco, F. G.; Rindzevicius, T.; Alstrøm, T. S.; Schmidt, M. S.; Boisen, A.; Ju, J.; Lin, Q. Surface-Enhanced Raman Spectroscopy Based Quantitative Bioassay on Aptamer-Functionalized Nanopillars Using Large-Area Raman Mapping. *ACS Nano* **2013**, *7* (6), 5350-5359.
5. Clark, R. J. H.; Hester, R. E. *Spectroscopy of Biological Systems*; Wiley, 1986.
